# Supplementary material for: A mild route to mesoporous Mo2C–C hybrid nanospheres for high performance lithium-ion batteries
Source: Royal Society of Chemistry journal article supplement (doi:10.1039/c3nr06678a), 2014-01-01

## **Electronic supplementary information (ESI)**

### **A mild route to mesoporous Mo<sub>2</sub>C/C hybrid nanospheres for high performance lithium-ion batteries**

Qing Gao<sup>a</sup>, Xinyu Zhao<sup>a</sup>, Ying Xiao<sup>a</sup>, Di Zhao<sup>a</sup>, Minhua Cao<sup>\*,a,b</sup>

Key Laboratory of Cluster Science, Ministry of Education of China, Beijing Key Laboratory of Photoelectronic/Electrophotonic Conversion Materials Department of Chemistry, Beijing Institute of Technology, Beijing 100081, P. R. China.

**Fig. S1** FE-SEM images of the bulk Mo<sub>2</sub>C.

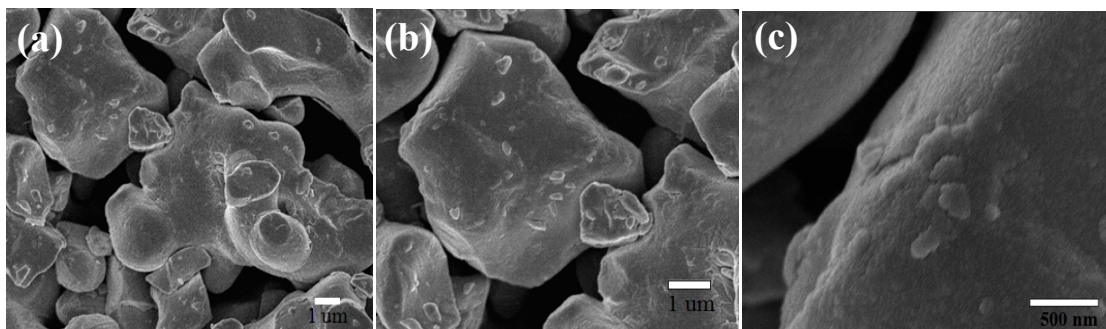

**Fig. S2** (a) XRD patterns and (b) XPS spectrum of the Mo<sub>2</sub>C/C electrode after the fourth discharge.

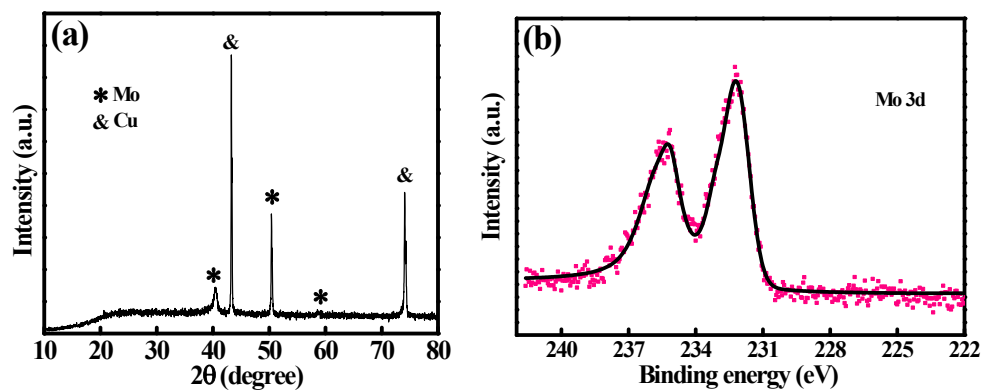

Supplement: c3nr06678a1.pdf [file c3nr06678a1.pdf]
